# Supplementary material for: Three-dimensional structure of the orbicularis retaining ligament: an anatomical study using micro-computed tomography
Source: PubMed Central journal article supplement (PMC6242969; doi:10.1038/s41598-018-35425-0), 2018-11-19
Supplement: 41598_2018_35425_MOESM1_ESM.pdf [file 41598_2018_35425_MOESM1_ESM.pdf]

**Three-dimensional structure of the orbicularis retaining ligament: an anatomical study using micro-computed tomography**

Jehoon O<sup>#</sup>, Hyun-Jin Kwon<sup>#</sup>, You-Jin Choi, Tae-Hyeon Cho and Hun-Mu Yang

**#co-1<sup>st</sup> authors. J.O. and H.J.K. contributed equally to the manuscript.**

**Department of Anatomy, Yonsei University College of Medicine, Seoul, Republic of Korea**

**Correspondence to:**

**Hun-Mu Yang, DDS, PhD**

Department of Anatomy, Yonsei University College of Medicine

Address: 50-1 Yonsei-ro, Seodaemun-gu, Seoul, 03722, Republic of Korea

Telephone: +82-2-2228-1649

E-mail: yanghm@yuhs.ac

## Authors information

### 1. Jehoon O, MFA

Department of Anatomy, Yonsei University College of Medicine

Address: 50-1 Yonsei-ro, Seodaemun-gu, Seoul 03722, South Korea

E-mail: jhoon81@yuhs.ac

### 2. Hyun-Jin Kwon, PhD Student

Department of Anatomy, Yonsei University College of Medicine

Address: 50-1 Yonsei-ro, Seodaemun-gu, Seoul 03722, South Korea

E-mail: hjkwon128@yuhs.ac

### 3. You-Jin Choi, PhD

Department of Anatomy, Yonsei University College of Medicine

Address: 50-1 Yonsei-ro, Seodaemun-gu, Seoul 03722, South Korea

E-mail: CYJ7797@yuhs.ac

### 4. Tae-Hyeon Cho, BS

Department of Anatomy, Yonsei University College of Medicine

Address: 50-1 Yonsei-ro, Seodaemun-gu, Seoul 03722, South Korea

E-mail: CHOTH@yuhs.ac

# Supplementary Video S1

## **Three-dimensional structure of the orbicularis retaining ligament**

Video showing the three-dimensional structure of the orbicularis retaining ligament (ORL) reconstructed from micro-computed tomography images.

# Supplementary Figure S1

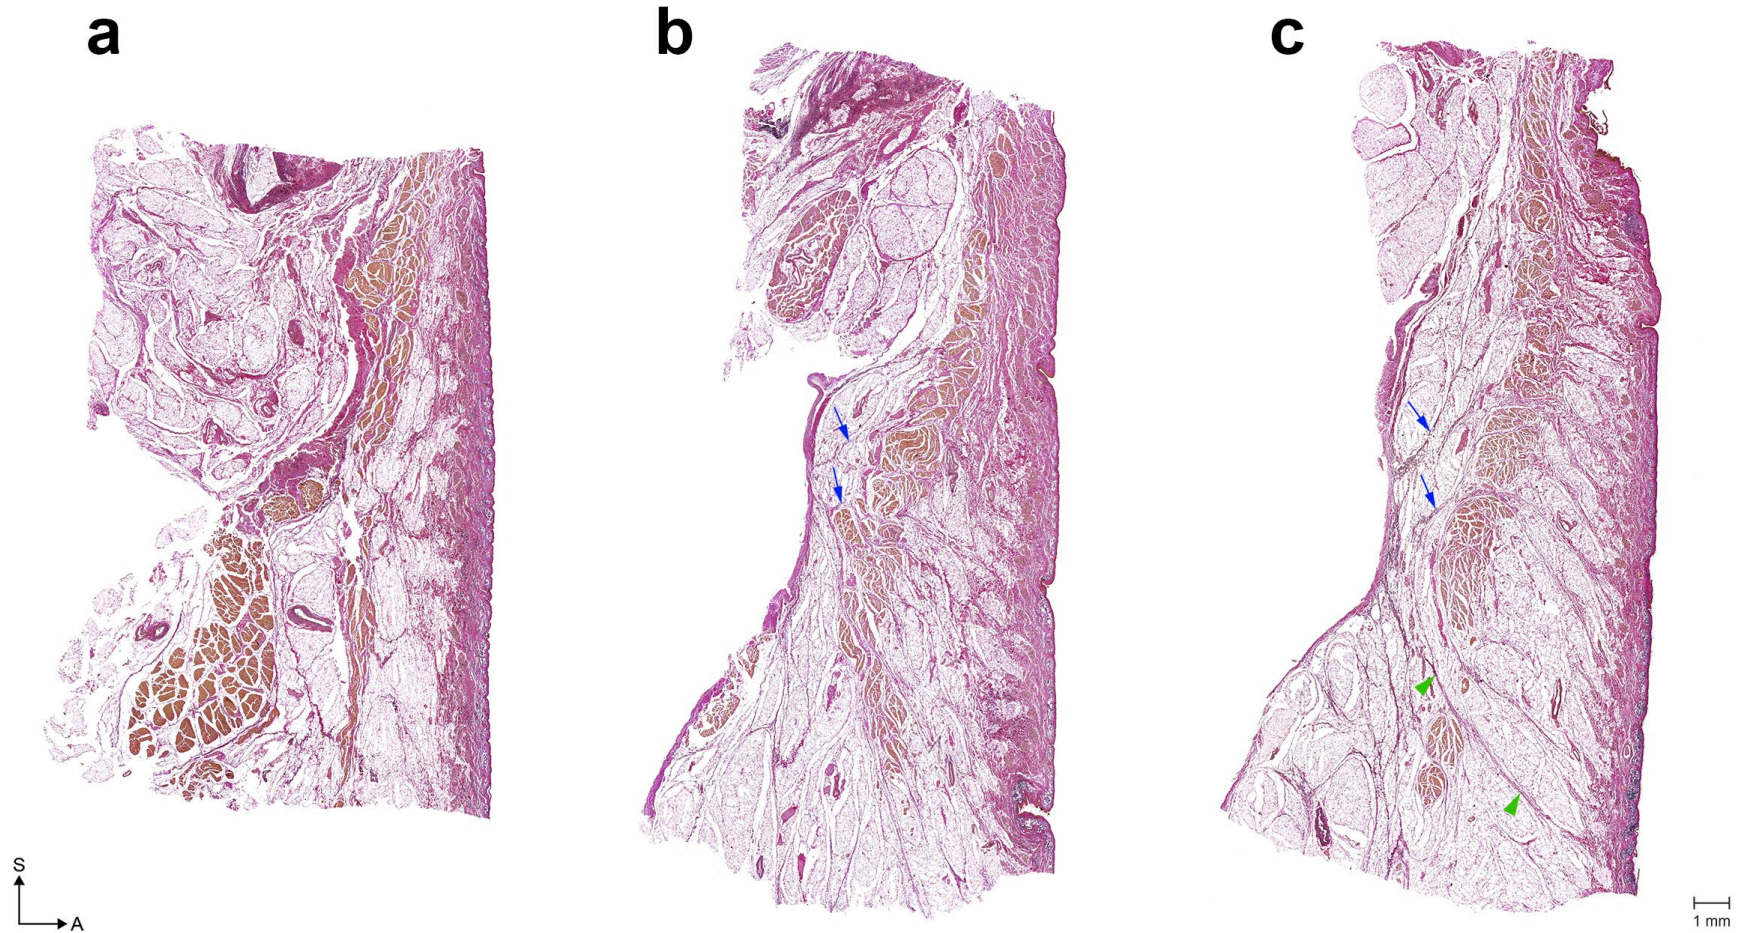

## Modified Verhoeff Van Gieson staining images

Modified Verhoeff Van Gieson staining images of the medial (a), central (b) and lateral (c) portions of the ORL. S, sagittal; A, anterior.

## Supplementary Figure S2

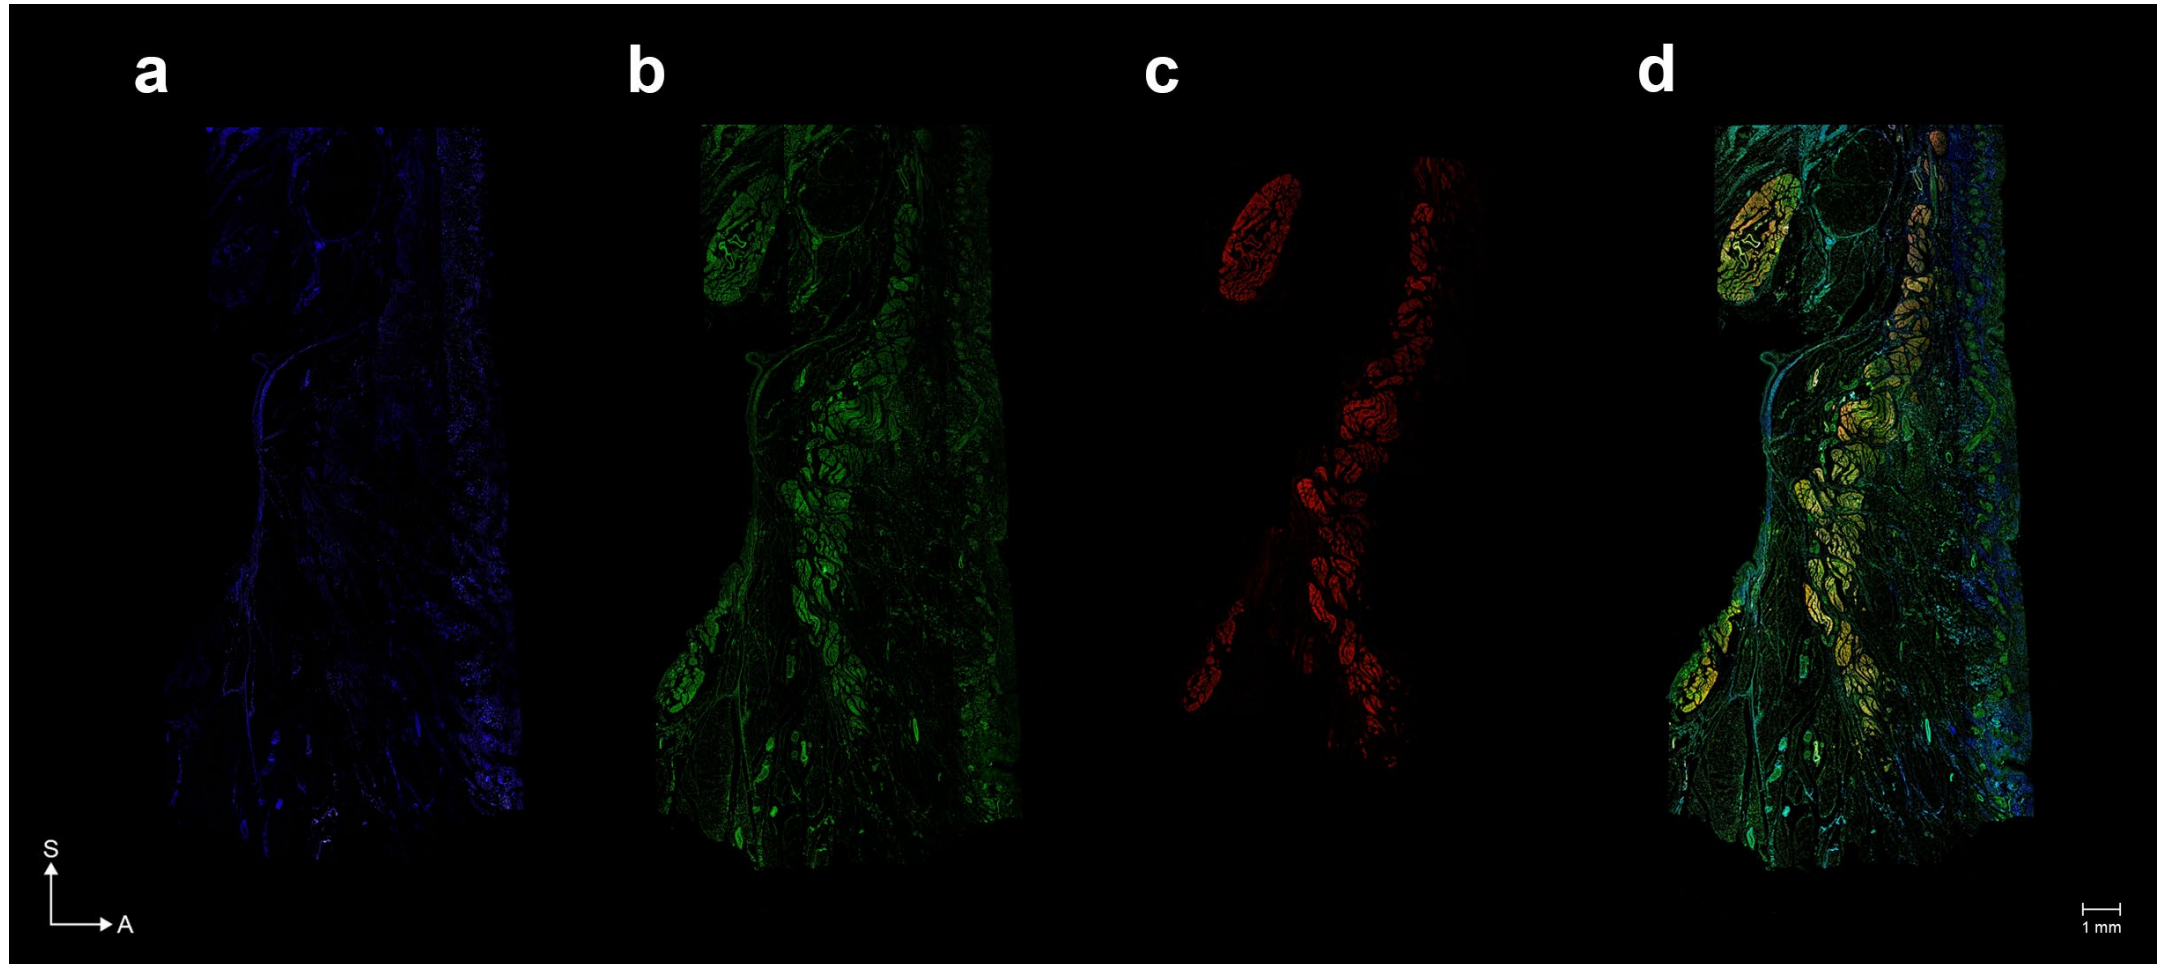

### Immunofluorescence of the ORL

Immunofluorescence of the ORL for elastin (a, blue), collagen type I (b, green) and actin (c, red). (d) Merged image.
